# Supplementary material for: Tau activation of microglial cGAS–IFN reduces MEF2C-mediated cognitive resilience
Source: PubMed Central journal article supplement (PMC10166855; doi:10.1038/s41593-023-01315-6), 2023-04-24

# Source data figure 2. Uncropped western blot scans in Figure 2.

## Uncropped western blot scans in Figure 2b.

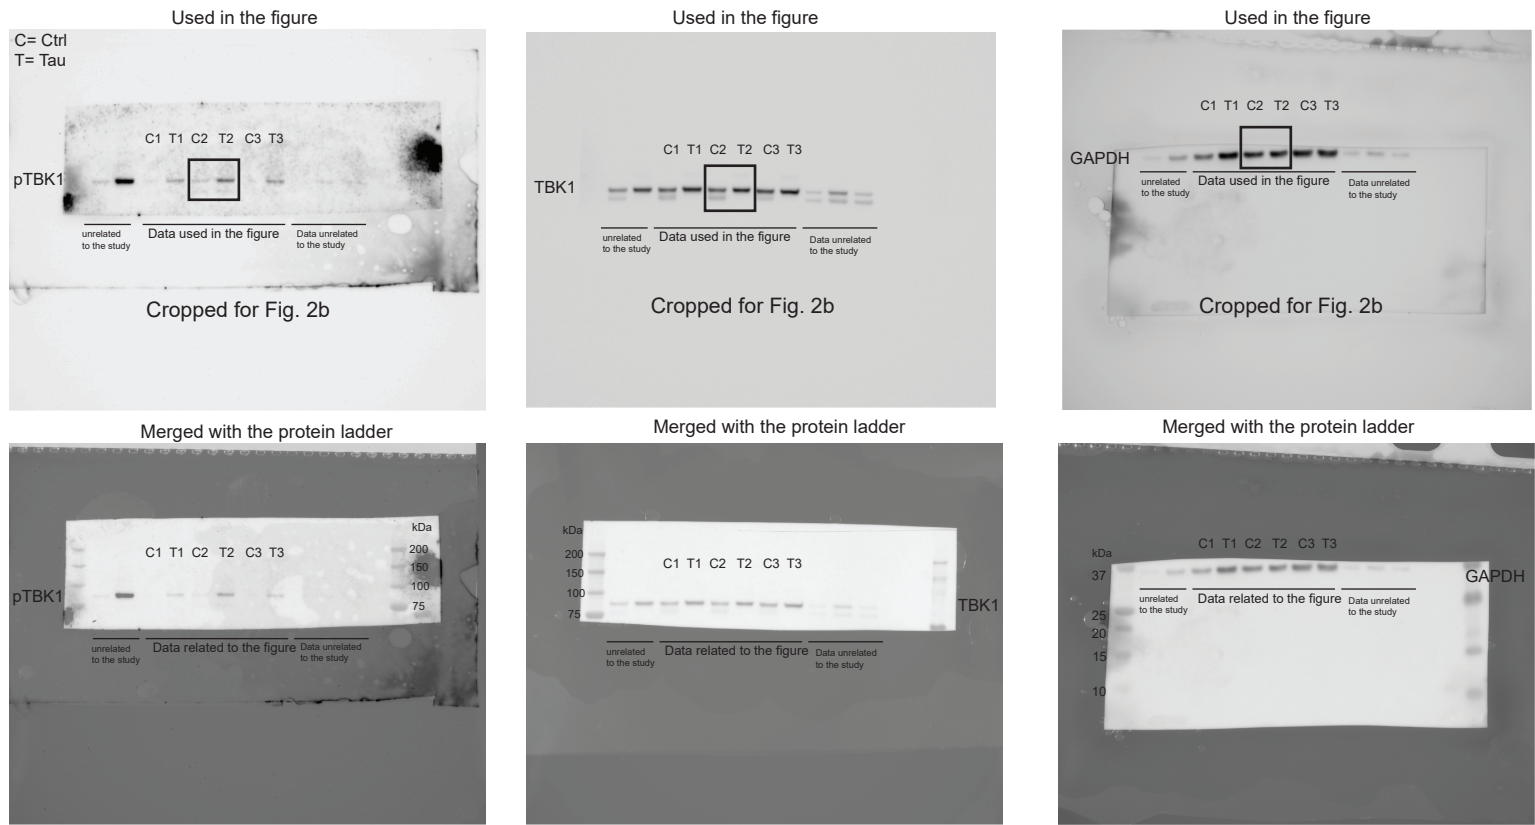

## Uncropped western blot scans in Figure 2i.

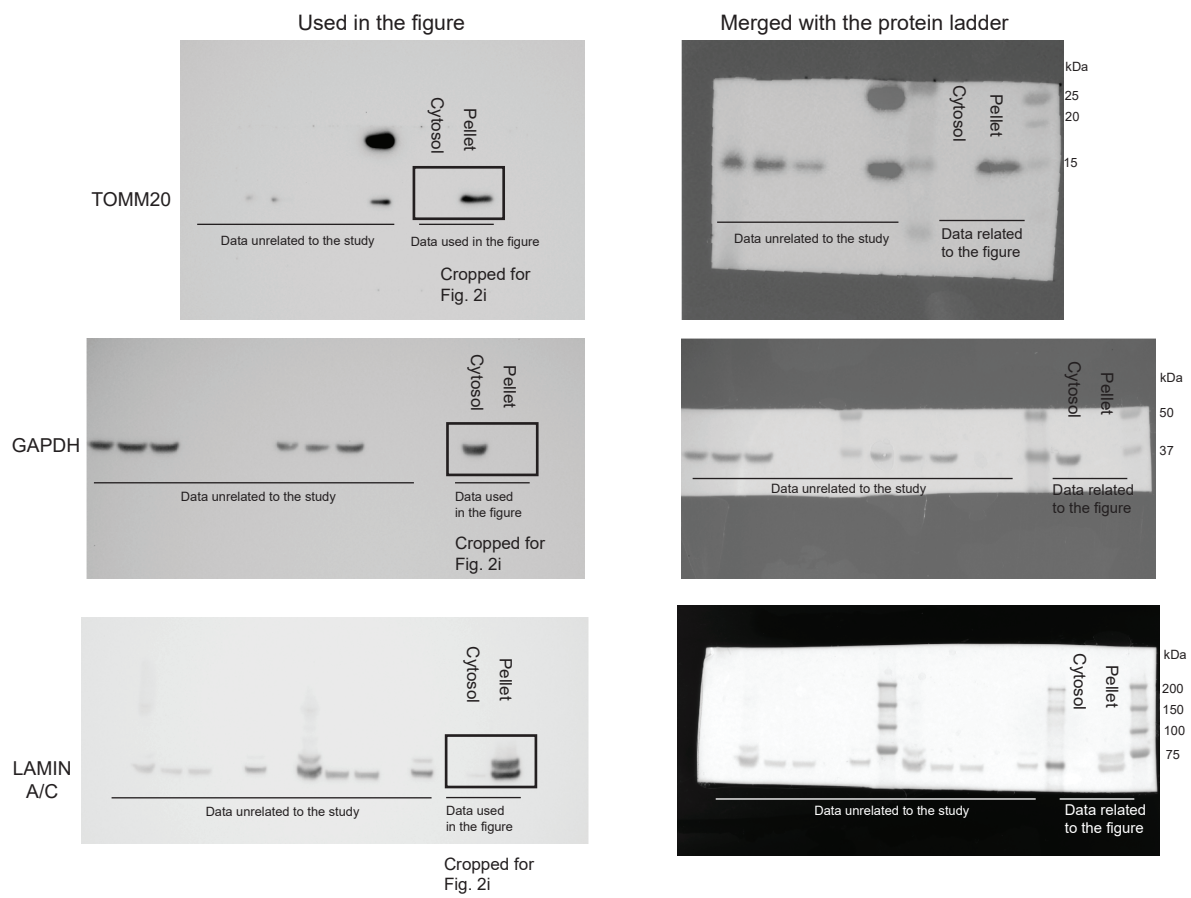

Supplement: 41593_2023_1315_MOESM15_ESM.pdf [file 41593_2023_1315_MOESM15_ESM.pdf]
